# Supplementary material
Source: PubMed Central journal article supplement (PMC4576058)
Supplement: AAC.00825-15_zac010154444so1.pdf [file AAC.00825-15_zac010154444so1.pdf]

TABLE S1 Susceptibility of the selected *P. aeruginosa* strains to therapeutic antipseudomonal  $\beta$ -lactams.

| Strains                                 | Origin                               | Sample                 | <i>ampC</i><br>expression <sup>a</sup> | PDC    | MIC ( $\mu\text{g/mL}$ ) <sup>b</sup> |          |     |                    |     |                             |            |             |
|-----------------------------------------|--------------------------------------|------------------------|----------------------------------------|--------|---------------------------------------|----------|-----|--------------------|-----|-----------------------------|------------|-------------|
|                                         |                                      |                        |                                        |        | TIC                                   | TZP      | ATM | CAZ                | FEP | CZ/T                        | IMP        | MER         |
| <b>Strains producing wild-type AmpC</b> |                                      |                        |                                        |        |                                       |          |     |                    |     |                             |            |             |
| PAO1                                    | Reference                            |                        | 1                                      | PDC-1  | 32                                    | 4        | 4   | 2 (1) <sup>c</sup> | 2   | 0.5 (0.5)                   | 1          | $\leq 0.25$ |
| 4098                                    | Reference                            |                        | ND                                     | PDC-1  | 16                                    | 4        | 4   | 1 (1)              | 1   | 0.5 ( $\leq 0.25$ )         | $\leq 0.5$ | $\leq 0.25$ |
| PAO1 $\Delta$ <i>dacB</i>               | Reference                            |                        | 290                                    | PDC-1  | 64                                    | 32       | 8   | 16 (2)             | 8   | 1 (0.5)                     | 1          | 0.5         |
| 14.2028                                 | Bourg S <sup>t</sup> M <sup>ce</sup> | Urine                  | 239                                    | PDC-3  | 128                                   | 16       | 16  | 4 (4)              | 16  | 2 (1)                       | 16         | 8           |
| 13.1642                                 | Nancy                                | Rectal swab            | 3,329                                  | PDC-8  | 256                                   | 256      | 128 | 64 (4)             | 32  | 4 (1)                       | 4          | 2           |
| 13.1781                                 | Montpellier                          | CF sputum <sup>d</sup> | 26.0                                   | PDC-24 | 512                                   | 256      | 64  | 128 (8)            | 64  | 4 (2)                       | 32         | 16          |
| PA14                                    | Reference                            |                        | ND                                     | PDC-34 | 16                                    | $\leq 2$ | 2   | 1 ( $\leq 0.5$ )   | 1   | $\leq 0.25$ ( $\leq 0.25$ ) | $\leq 0.5$ | $\leq 0.25$ |
| 11.773                                  | Bellegarde                           | Urine                  | 511                                    | PDC-35 | 256                                   | 64       | 16  | 8 (8)              | 8   | 1 (1)                       | 8          | 8           |
| <b>Strains producing ESAC</b>           |                                      |                        |                                        |        |                                       |          |     |                    |     |                             |            |             |
| 12.1227                                 | Besançon                             | Stool                  | 737                                    | PDC-44 | 64                                    | 16       | 16  | 32 (16)            | >64 | 4 (1)                       | 4          | 8           |
| 12.1255                                 | Besançon                             | Catheter               | 2,895                                  | PDC-44 | 128                                   | 128      | 64  | 512 (64)           | >64 | 32 (4)                      | 16         | 16          |
| 10.257                                  | Besançon                             | COPD <sup>e</sup>      | 2,120                                  | PDC-50 | 256                                   | 128      | 64  | 256 (64)*          | 32  | 8 (4)*                      | 8          | 2           |
| 12.1285                                 | S <sup>t</sup> Denis R <sup>n</sup>  | Rectal swab            | 188                                    | PDC-73 | 32                                    | $\leq 2$ | 8   | 16 (1)*            | 16  | 0.5 ( $\leq 0.25$ )*        | $\leq 0.5$ | $\leq 0.25$ |
| 12.1111                                 | Brest                                | CF sputum              | 1,233                                  | PDC-74 | 128                                   | 4        | 16  | 16 (8)             | 8   | 1 (1)                       | 16         | 8           |

|         |             |                           |       |        |      |     |     |            |     |            |      |       |
|---------|-------------|---------------------------|-------|--------|------|-----|-----|------------|-----|------------|------|-------|
| 13.1716 | Pessac      | CF sputum                 | 12    | PDC-74 | >512 | 64  | 128 | >512 (64)  | >64 | 32 (32)    | 4    | 4     |
| 12.1129 | Toulouse    | CF sputum                 | 267   | PDC-75 | 256  | ≤2  | 64  | 64 (32)    | 8   | 4 (2)      | 16   | 8     |
| 13.1727 | Toulouse    | CF sputum                 | 46.6  | PDC-75 | 128  | ≤2  | 16  | 16 (4)     | 16  | 1 (0.5)    | 16   | 4     |
| 13.1415 | Nantes      | CF sputum                 | 4.4   | PDC-76 | ≤4   | ≤2  | ≤1  | 64 (32)*   | 8   | 16 (8)*    | 32   | 16    |
| 13.1404 | Martigues   | Wound                     | 73.2  | PDC-77 | 512  | 8   | 64  | 64 (32)    | 16  | 8 (4)      | 16   | 8     |
| 13.1696 | Marseille   | Tr. aspirate <sup>f</sup> | 173   | PDC-77 | 512  | 16  | 64  | 128 (64)   | 16  | 8 (4)      | 16   | 8     |
| 13.1760 | Tours       | CF sputum                 | 112   | PDC-77 | 256  | 16  | 64  | 64 (32)    | 16  | 8 (4)      | 16   | 8     |
| 11.571  | Gap         | COPD                      | 688   | PDC-78 | 256  | 16  | 64  | 64 (32)    | 16  | 8 (2)      | 8    | 4     |
| 11.516  | Besançon    | Tr. aspirate              | 202   | PDC-79 | 256  | 16  | 32  | 256 (128)  | 16  | 64 (64)    | 2    | 4     |
| 13.1737 | Amiens      | Tr aspirate               | 114   | PDC-80 | 512  | 128 | 64  | 256 (128)  | 16  | 64 (64)    | 1    | 4     |
| 13.1514 | Besançon    | CF sputum                 | 31.4  | PDC-81 | >512 | 128 | 64  | >512 (32)  | >64 | 16 (8)     | 32   | 16    |
| 13.1770 | Besançon    | COPD                      | 1,147 | PDC-82 | 512  | 64  | 128 | 256 (128)  | 32  | 64 (64)    | 1    | 0.5   |
| 4836    | Besançon    | CF sputum                 | 8.5   | PDC-83 | 256  | 8   | 16  | 256 (32)*  | 64  | 4 (4)*     | 8    | 4     |
| 13.1482 | Nancy       | CF sputum                 | 35.4  | PDC-84 | 256  | 64  | 128 | >512 (64)  | >64 | >64 (16)   | 2    | 2     |
| 12.961  | Amiens      | CF sputum                 | 37.9  | PDC-85 | 128  | ≤2  | 8   | 16 (8)     | 8   | 32 (16)    | 1    | 0.5   |
| 13.1755 | Wissous     | COPD                      | 192   | PDC-86 | >512 | 32  | 64  | >512 (512) | 32  | >64 (>64 ) | 8    | 8     |
| 14.1999 | Besançon    | Tr. aspirate              | 2,351 | PDC-86 | >512 | 64  | 128 | >512 (512) | 32  | >64 (>64 ) | ≤0.5 | ≤0.25 |
| 11.698  | Montpellier | Urine                     | 1,439 | PDC-87 | >512 | 64  | 32  | >512 (512) | 32  | 8 (2)      | 16   | 8     |
| 13.1775 | Montpellier | Urine                     | 2,322 | PDC-87 | >512 | 32  | 32  | 512 (64)   | 32  | 8 (4)      | 16   | 4     |

|                |          |             |       |        |     |     |    |          |     |        |    |    |
|----------------|----------|-------------|-------|--------|-----|-----|----|----------|-----|--------|----|----|
| <b>13.1601</b> | Grenoble | Blood       | 345   | PDC-88 | 128 | 256 | 32 | 512 (32) | >64 | 16 (4) | 16 | 16 |
| <b>09.236</b>  | Besançon | Stool       | 1,502 | PDC-89 | 128 | 64  | 64 | 256 (64) | >64 | 16 (8) | 8  | 8  |
| <b>13.1562</b> | Besançon | Stool       | 1,238 | PDC-90 | 16  | 16  | 8  | 64 (32)  | >64 | 4 (2)  | 8  | 4  |
| <b>11.813</b>  | Paris    | Rectal swab | 289   | PDC-91 | 32  | 16  | 8  | 64 (16)  | >64 | 4 (2)  | 4  | 4  |
| <b>12.1121</b> | Bordeaux | COPD        | 1,009 | PDC-92 | 128 | 64  | 32 | 128 (64) | >64 | 8 (4)  | 8  | 16 |
| <b>13.1389</b> | Bordeaux | Blood       | 449   | PDC-92 | 128 | 32  | 32 | 128 (64) | >64 | 4 (4)  | 8  | 16 |
| <b>14.2036</b> | Pau      | Sputum      | 184   | PDC-93 | 128 | 32  | 32 | 128 (32) | >64 | 4 (2)  | 8  | 8  |

---

<sup>a</sup> values from two independent cultures with duplicate determinations

<sup>b</sup> values from at least two independent experiments

<sup>c</sup> values in brackets represent the MIC for bacteria grown in the presence of 1,000 µg/mL of cloxacillin (\* 250 µg/mL when inhibited by 1,000 µg/mL)

<sup>d</sup> cystic fibrosis sputum

<sup>e</sup> chronic obstructive pulmonary disease sputum

<sup>f</sup> tracheal aspirate

Abbreviations: TIC (ticarcillin), TZP (piperacillin plus tazobactam at a fixed concentration of 4 µg/mL), ATM (aztreonam), CAZ (ceftazidime), FEP (cefepime), CZ/T (ceftolozane plus tazobactam at a fixed concentration of 4 µg/mL), IMP (imipenem), MER (meropenem).

TABLE S2 ESAC-associated mutations in various class C  $\beta$ -lactamases

| Enzyme name                | ESAC-associated mutations      | Domain                 | Position in <i>P. aeruginosa</i> AmpC | Reference |
|----------------------------|--------------------------------|------------------------|---------------------------------------|-----------|
| <i>E. coli</i> AmpC        | S duplication at position 282  | H-9 helix              | R283                                  | (1)       |
|                            | I duplication at position 283  | H-9 helix              | L284                                  | (2)       |
|                            | $\Delta$ (G286-D288)           | H-9 helix near R2 loop | G287-S289                             | (3)       |
|                            | S287C                          | H-9 helix near R2 loop | N288                                  | (4)       |
|                            | S287N                          | H-9 helix near R2 loop | N288                                  | (5)       |
|                            | A292V                          | R2 loop                | <b>A293</b>                           | (6)       |
|                            | L293S                          | R2 loop                | <b>L294</b>                           | (7)       |
|                            | AA insertion between L293-A294 | R2 loop                | <b>L294-Q295</b>                      | (8)       |
|                            | LAA insertion at position 295  | R2 loop                | P296                                  | (6)       |
|                            | H/R/L/296P                     | R2 loop                | H297                                  | (4)       |
|                            | V298L                          | R2 loop                | I299                                  | (4)       |
|                            | V350F                          | H-11 helix             | V351                                  | (4)       |
|                            | <i>Enterobacter</i> AmpC       | $\Delta$ (K193-G206)   | omega loop                            | E194-D208 |
| tandem repeat A211 to R213 |                                | omega loop             | P210-L211- <b>R212</b>                | (10)      |
| $\Delta$ (S289-A294)       |                                | R2 loop                | <b>T290-Q295</b>                      | (11)      |
| V291G                      |                                | R2 loop                | <b>M292</b>                           | (12)      |
| L293P                      |                                | R2 loop                | <b>L294</b>                           | (13)      |
| N346H/I                    |                                | H-11 helix             | <b>N347</b>                           | (9)       |
| <i>S. marcescens</i> AmpC  | T58I                           | H-2 helix              | T70                                   | (14)      |
|                            | E219K                          | omega loop             | <b>E221</b>                           | (15)      |
|                            | S220Y                          | omega loop             | G222                                  | (16)      |
|                            | $\Delta$ (M287-T290)           | R2 loop                | <b>L294-Q295</b>                      | (17)      |
| <i>C. freundii</i> AmpC    | R148H                          | near Y-X-N loop        | R149                                  | (18)      |

|                           |                              |                       |                          |                     |
|---------------------------|------------------------------|-----------------------|--------------------------|---------------------|
| CMY                       | V211G (CMY-30) <sup>a</sup>  | omega loop            | <b>V213</b>              | (19)                |
|                           | V211S (CMY-42)               | omega loop            | <b>V213</b>              | (20)                |
|                           | V211A (CMY-95)               | omega loop            | <b>V213</b>              | (7)                 |
|                           | G214E (CMY-32)               | omega loop            | <b>G216</b>              | (21)                |
|                           | I292S (CMY-19)               | R2 loop               | <b>A293</b>              | (22)                |
|                           | L316I (CMY-37)               | R2 loop               | H297                     | (23)                |
|                           | N346I (CMY-10)               | H-11 helix            | <b>N347</b>              | (24, 25)            |
| ACC-1                     | V211G (ACC-4)                | omega loop            | <b>V213</b>              | (26)                |
| <i>A. baumannii</i> ADC   | P210R and AA215 (ADC-33)     | omega loop            | <b>P215, A220</b>        | (27)                |
|                           | V208A (ADC-53)               | omega loop            | <b>V213</b>              | (28)                |
|                           | N283S (ADC-51)               | H10 near R2 loop      | N288                     | (28)                |
|                           | R148Q (ADC-56)               | not specified         | R149                     | (29)                |
|                           | P194A, G220D, R320G (ADC-68) | omega loop and C-loop | P193, <b>D219</b> , G322 | (30)                |
| <i>P. aeruginosa</i> AmpC | F121L                        | alpha3-alpha4 loop    |                          | This study and (31) |
|                           | P154L                        | H-5 helix             |                          | This study          |
|                           | G157D                        | H-5 helix             |                          | (32)                |
|                           | M175L                        | H-6 helix             |                          | This study          |
|                           | Δ(R212-L218)                 | omega loop            |                          | (32)                |
|                           | V213A                        | omega loop            |                          | This study          |
|                           | G216R                        | omega loop            |                          | This study          |
|                           | Δ(D219-Y223)                 | omega loop            |                          | (32)                |
|                           | E221K                        | omega loop            |                          | This study and (31) |
|                           | E221G                        | omega loop            |                          | This study          |
|                           | Y223H                        | omega loop            |                          | This study          |
|                           | Δ(T290-P291)                 | R2 loop               |                          | This study          |
|                           | Δ(T290-M292)                 | R2 loop               |                          | This study          |
| Δ(T290-A293)              | R2 loop                      |                       | This study               |                     |

|              |                           |            |
|--------------|---------------------------|------------|
| Δ(L294-Q295) | R2 loop                   | This study |
| L294P        | R2 loop                   | This study |
| N347I        | C3/C4-carboxylate binding | This study |

---

<sup>a</sup> Name of ESAC

Amino acid positions indicated in bold have been found to be mutated both in *P. aeruginosa* AmpC and other class C β-lactamases considered as ESAC.

## References

1. **Guillon H, Tandé D, Mammeri H.** 2011. Emergence of ertapenem resistance in an *Escherichia coli* clinical isolate producing extended-spectrum β-lactamase AmpC. *Antimicrob. Agents Chemother.* **55**:4443-4446.
2. **Mammeri H, Eb F, Berkani A, Nordmann P.** 2008. Molecular characterization of AmpC-producing *Escherichia coli* clinical isolates recovered in a French hospital. *J. Antimicrob. Chemother.* **61**:498-503.
3. **Doi Y, Wachino J-I, Ishiguro M, Kurokawa H, Yamane K, Shibata N, Shibayama K, Yokoyama K, Kato H, Yagi T, Arakawa Y.** 2004. Inhibitor-sensitive AmpC β-lactamase variant produced by an *Escherichia coli* clinical isolate resistant to oxyiminocephalosporins and cephamycins. *Antimicrob. Agents Chemother.* **48**:2652-2658.
4. **Mammeri H, Poirel L, Fortineau N, Nordmann P.** 2006. Naturally occurring extended-spectrum cephalosporinases in *Escherichia coli*. *Antimicrob. Agents Chemother.* **50**:2573-2576.
5. **Mammeri H, Galleni M, Nordmann P.** 2009. Role of the Ser-287-Asn replacement in the hydrolysis spectrum extension of AmpC β-lactamases in *Escherichia coli*. *Antimicrob. Agents Chemother.* **53**:323-326.
6. **Crémet L, Caroff N, Giraudeau C, Dauvergne S, Lepelletier D, Reynaud A, Corvec S.** 2010. Occurrence of ST23 complex phylogroup A *Escherichia coli* isolates producing extended-spectrum AmpC β-lactamase in a French hospital. *Antimicrob. Agents Chemother.* **54**:2216-2218.
7. **Crémet L, Caroff N, Giraudeau C, Reynaud A, Caillon J, Corvec S.** 2013. Detection of clonally related *Escherichia coli* isolates producing different CMY β-lactamases from a cystic fibrosis patient. *J. Antimicrob. Chemother.* **68**:1032-1035.

8. **Mammeri H, Poirel L, Nordmann P.** 2007. Extension of the hydrolysis spectrum of AmpC  $\beta$ -lactamase of *Escherichia coli* due to amino acid insertion in the H-10 helix. *J. Antimicrob. Chemother.* **60**:490-494.
9. **Livermore DM, Mushtaq S, Barker K, Hope R, Warner M, Woodford N.** 2012. Characterization of beta-lactamase and porin mutants of *Enterobacteriaceae* selected with ceftaroline + avibactam (NXL104). *J. Antimicrob. Chemother.* **67**:1354-1358.
10. **Nukaga M, Haruta S, Tanimoto K, Kogure K, Taniguchi K, Tamaki M, Sawai T.** 1995. Molecular evolution of a class C  $\beta$ -lactamase extending its substrate specificity. *J. Biol. Chem.* **270**:5729-5735.
11. **Barnaud G, Labia R, Raskine L, Sanson-Le Pors MJ, Philippon A, Arlet G.** 2001. Extension of resistance to cefepime and ceftazidime associated with a six amino acid deletion in the H-10 helix of the cephalosporinase of an *Enterobacter cloacae* clinical isolate. *FEMS Microbiol. Lett.* **195**:185-190.
12. **Rodríguez-Martínez JM, Fernández-Echauri P, Fernández-Cuenca F, Díaz de Alba P, Briales A, Pascual A.** 2012. Genetic characterization of an extended-spectrum AmpC cephalosporinase with hydrolysing activity against fourth-generation cephalosporins in a clinical isolate of *Enterobacter aerogenes* selected *in vivo*. *J. Antimicrob. Chemother.* **67**:64-68.
13. **Barnaud G, Benzerara Y, Gravisse J, Raskine L, Sanson-Le Pors MJ, Labia R, Arlet G.** 2004. Selection during cefepime treatment of a new cephalosporinase variant with extended-spectrum resistance to cefepime in an *Enterobacter cloacae* clinical isolate. *Antimicrob. Agents Chemother.* **48**:1040-1042.
14. **Raimondi A, Sisto F, Nikaido H.** 2001. Mutation in *Serratia marcescens* AmpC beta-lactamase producing high-level resistance to ceftazidime and ceftazidime. *Antimicrob. Agents Chemother.* **45**:2331-2339.
15. **Matsumura N, Minami S, Mitsuhashi S.** 1998. Sequences of homologous  $\beta$ -lactamases from clinical isolates of *Serratia marcescens* with different substrate specificities. *Antimicrob. Agents Chemother.* **42**:176-179.
16. **Hidri N, Barnaud G, Decré D, Cerceau C, Lalande V, Petit J-C, Labia R, Arlet G.** 2005. Resistance to ceftazidime is associated with a S220Y substitution in the omega loop of the AmpC  $\beta$ -lactamase of a *Serratia marcescens* clinical isolate. *J. Antimicrob. Chemother.* **55**:496-499.
17. **Mammeri H, Poirel L, Bemer P, Drugeon H, Nordmann P.** 2004. Resistance to cefepime and ceftazidime due to a 4-amino-acid deletion in the chromosome-encoded AmpC  $\beta$ -lactamase of a *Serratia marcescens* clinical isolate. *Antimicrob. Agents Chemother.* **48**:716-720.
18. **Dahyot S, Mammeri H.** 2012. Hydrolysis spectrum extension of CMY-2-like beta-lactamases resulting from structural alteration in the Y-X-N loop. *Antimicrob. Agents Chemother.* **56**:1151-1156.
19. **Kotsakis SD, Papagiannitsis CC, Tzelepi E, Tzouvelekis LS, Miriagou V.** 2009. Extended-spectrum properties of CMY-30, a Val211Gly mutant of CMY-2 cephalosporinase. *Antimicrob. Agents Chemother.* **53**:3520-3523.
20. **Hentschke M, Kotsakis SD, Wolters M, Heisig P, Miriagou V, Aepfelbacher M.** 2011. CMY-42, a novel plasmid-mediated CMY-2 variant AmpC beta-lactamase. *Microb. Drug. Resist.* **17**:165-169.

21. **Endimiani A, Doi Y, Bethel CR, Taracila M, Adams-Haduch M, O'Keefe A, Hujer AM, Paterson DL, Skalweit MJ, Page MGP, Drawz SM, Bonomo RA.** 2010. Enhancing resistance to cephalosporins in class C  $\beta$ -lactamases: impact of Glu214Gly in CMY-2. *Biochemistry* **49**:1014-1023.
22. **Wachino J, Kurokawa H, Suzuki S, Yamane K, Shibata N, Kimura K, Ike Y, Arakawa Y.** 2006. Horizontal transfer of *bla*CMY-bearing plasmids among clinical *Escherichia coli* and *Klebsiella pneumoniae* isolates and emergence of cefepime-hydrolyzing CMY-19. *Antimicrob. Agents Chemother.* **50**:534-541.
23. **Ahmed AM, Shimamoto T.** 2008. Emergence of a cefepime- and ceftazidime-resistant *Citrobacter freundii* clinical isolate harbouring a novel chromosomally-encoded AmpC  $\beta$ -lactamase, CMY-37. *Int. J. Antimicrob. Agents* **32**:256-261.
24. **Dahyot S, Broutin I, de Champs C, Guillon H, Mammeri H.** 2013. Contribution of asparagine 346 residue to the carbapenemase activity of CMY-2. *FEMS Microbiol. Lett.* **345**:147-153.
25. **Lee SH, Jeong SH, Park YM.** 2003. Characterization of *bla*CMY-10 a novel, plasmid-encoded AmpC-type beta-lactamase gene in a clinical isolate of *Enterobacter aerogenes*. *J. Appl. Microbiol.* **95**:744-752.
26. **Papagiannitsis CC, Tzouveleki LS, Tzelepi E, Miriagou V.** 2007. Plasmid-encoded ACC-4, an extended-spectrum cephalosporinase variant from *Escherichia coli*. *Antimicrob. Agents Chemother.* **51**:3763-3767.
27. **Rodriguez-Martinez JM, Nordmann P, Ronco E, Poirel L.** 2010. Extended-spectrum cephalosporinase in *Acinetobacter baumannii*. *Antimicrob. Agents Chemother.* **54**:3484-3488.
28. **Rodriguez-Martinez JM, Poirel L, Nordmann P.** 2010. Genetic and functional variability of AmpC-type  $\beta$ -lactamases from *Acinetobacter baumannii*. *Antimicrob. Agents Chemother.* **54**:4930-4933.
29. **Tian GB, Adams-Haduch JM, Taracila M, Bonomo RA, Wang HN, Doi Y.** 2011. Extended-spectrum AmpC cephalosporinase in *Acinetobacter baumannii*: ADC-56 confers resistance to cefepime. *Antimicrob. Agents Chemother.* **55**:4922-4925.
30. **Jeon JH, Hong MK, Lee JH, Lee JJ, Park KS, Karim AM, Jo JY, Kim JH, Ko KS, Kang LW, Lee SH.** 2014. Structure of ADC-68, a novel carbapenem-hydrolyzing class C extended-spectrum beta-lactamase isolated from *Acinetobacter baumannii*. *Acta Cryst.* **D70**:2924-2936.
31. **Cabot G, Bruchmann S, Mulet X, Zamorano L, Moya B, Juan C, Haussler S, Oliver A.** 2014. *Pseudomonas aeruginosa* ceftolozane-tazobactam resistance development requires multiple mutations leading to overexpression and structural modification of AmpC. *Antimicrob. Agents Chemother.* **58**:3091-3099.
32. **Lahiri SD, Walkup GK, Whiteaker JD, Palmer T, McCormack K, Tanudra MA, Nash TJ, Thresher J, Johnstone MR, Hajec L, Livchak S, McLaughlin RE, Alm RA.** 2015. Selection and molecular characterization of ceftazidime/avibactam-resistant mutants in *Pseudomonas aeruginosa* strains containing derepressed AmpC. *J. Antimicrob. Chemother.*:doi:10.1093/jac/dkv1004.
